# Supplementary material for: Exogenous Carbon Compounds Modulate Tomato Root Development
Source: MDPI journal article supplement (doi:10.3390/plants9070837), 2020-07-03
Supplement: s1 [file s1]

Table S1. Primer sequences

| Gene          | Genebank accession number | Forward                    | Reverse                   | Reference |
|---------------|---------------------------|----------------------------|---------------------------|-----------|
| <i>EF1a</i>   | NM_001247106.1            | GACAGGCGTTCAGGTAAGGA       | GGGTATTCAAGCAAAGGTCTC     | [50]      |
| <i>NRT1.1</i> | X92853                    | TACTATTCAAGCTATGGGTGTTACG  | ATTTGTCCTCTTTCTTTTTGTCCG  | [69]      |
| <i>NRT1.2</i> | X92852.1                  | CCTGAGACACAAAATGATGC       | AGTCACCAAGTTTACAGCAA      | [50]      |
| <i>NRT2.1</i> | AF092705                  | TTCCTGTTACATTTTGTCAATTTCCC | CAGATTCAAGACTATCCATTCTCA  | [69]      |
| <i>NRT2.2</i> | AF092704                  | TCAAGGGAACGGAAGAACATTATTA  | GCTCATTGAACTAAAGATTGACGAT | [69]      |
| <i>NRT2.3</i> | AY038800                  | AATGCATGGTGTACTGGTAGAGAG   | CTAATAATAGGGACTAAAGGGGCTG | [69]      |
| <i>NR</i>     | X14060.1                  | TGGTTTCAATTGGGGTGCTG       | ACTTTGAACCACCACCTCCA      | [50]      |
| <i>NiR</i>    | AB211188.1                | GCGTATATGCCTGCAACCAA       | GTTTTCTGCCTGTTCCCTCG      | [50]      |
| <i>GS1</i>    | AF200360.1                | ATTGGCGGTTTTCTGGCCC        | ACTGTCCCGGCATGACTTCACC    | [68]      |
| <i>GOGAT</i>  | XM_004234782.3            | ACAGAGGTCAAAAGGCGAGT       | CTTCCCTTGTGCTGCCATAC      | [50]      |
| <i>GDH</i>    | U48695.1                  | AGCACGACAATGCACGAGGG       | ATATTGGCGACCGCTGTCTTCC    | [68]      |
| <i>ASN1</i>   | NM_001319849.1            | TGCTCGATACTTGCTGGAA        | GCATCAATCCCGTCCTGAAC      | [50]      |
| <i>PK1</i>    | SGN-U579698               | AGAATGGGTTTAGGAGTAC        | GTGGATCAAATGCACGAAC       | [70]      |
| <i>PEPC1</i>  | AJ243416.1                | TGTGAACCTGAACCCGACT        | GTCCCCTATTCGGGACTTC       | [70]      |
| <i>GSH</i>    | NM_001247085.2            | CCTGGTGTTGATATGGTTCA       | AAAGGATCAGCTTTTCTCGT      | [50]      |
| <i>SOD CI</i> | NM_001247102.1            | ACAGGACCACATTACAATCC       | ACAACAGCTCTTCCAATGAT      | [50]      |
| <i>SOD Ct</i> | NM_001247840.1            | ACCAGCACTACCAATTCTTT       | AGTAAGGGGTTTAGGGGTAG      | [50]      |
| <i>LAX1</i>   | NC_015446.2               | CAGAAGCAAGCAGAGGAAGC       | GAACCAAGCATCCCAAGCAG      |           |
| <i>LAX2</i>   | NM_001247746.1            | GTTTCGCTTGACACCATTTG       | AACGGTGAAGCTAACGAGGA      |           |
| <i>LAX3</i>   | HQ671070.1                | TGAAGCACTCAGGACCAACA       | AGCCCAATACACTGCACTTG      | [50]      |
| <i>LAX4</i>   | NM_001247759.1            | GTCTACTGGGCATTTCGAGA       | CCAGACAAAGTACAAGGGCG      | [50]      |
| <i>PIN3</i>   | NC_015441.2               | TTCAAAAATCAATTTAGCGTGTCA   | CTCAAAAATCCCTCTTGTTCG     | [50]      |
| <i>PIN4</i>   | NM_001247255.1            | AAAGAGGGACCCACTGGACT       | TCATAACACTAGCCGGAGGC      | [50]      |
